# Supplementary material
Source: publisher figshare collection journal article supplement (https://asha.figshare.com/ndownloader/files/29004402)
Supplement: Supplementary file 1 [file 29004402]

Appendix A. Adapted 6+1 trait scoring rubric used in the present study.

| 1<br>Experimenting                                                                                                                                                                                                                                                                        | 2<br>Emerging                                                                                                                                                                                                                                                                                                                                                        | 3<br>Developing                                                                                                                                                                                                                                                                                                                                                                                        | 4<br>Capable                                                                                                                                                                                                                                                                                                                                                                                                        | 5<br>Experienced                                                                                                                                                                                                                                                                                                                               |
|-------------------------------------------------------------------------------------------------------------------------------------------------------------------------------------------------------------------------------------------------------------------------------------------|----------------------------------------------------------------------------------------------------------------------------------------------------------------------------------------------------------------------------------------------------------------------------------------------------------------------------------------------------------------------|--------------------------------------------------------------------------------------------------------------------------------------------------------------------------------------------------------------------------------------------------------------------------------------------------------------------------------------------------------------------------------------------------------|---------------------------------------------------------------------------------------------------------------------------------------------------------------------------------------------------------------------------------------------------------------------------------------------------------------------------------------------------------------------------------------------------------------------|------------------------------------------------------------------------------------------------------------------------------------------------------------------------------------------------------------------------------------------------------------------------------------------------------------------------------------------------|
| <p><b>IDEAS</b></p> <ul style="list-style-type: none"> <li>- The big idea is not relevant to the prompt.</li> <li>- Details are missing.</li> </ul>                                                                                                                                       | <p><b>IDEAS</b></p> <ul style="list-style-type: none"> <li>- The idea is conveyed in a general way with few details.</li> <li>- One simple statement captures the topic (e.g., one statement/sentence).</li> <li>- At least one relevant idea is represented.</li> <li>- Relevant idea is defined as anything that occur at home, school, and in-between.</li> </ul> | <p><b>IDEAS</b></p> <ul style="list-style-type: none"> <li>- The writing is made up of several sentences on one topic – 2 or more idea that are relevant to the topic.</li> <li>- A few basic details are present in the text.</li> <li>- Might have sentences that are irrelevant and not on topic.</li> <li>- Might have several sentences that are repetitive and do not add new detail.</li> </ul> | <p><b>IDEAS</b></p> <ul style="list-style-type: none"> <li>- Writing tells a story or makes a point.</li> <li>- Idea tends to stay on topic, but may not be as narrow and focused as possible. At least one idea is elaborated – mental picture may be easily developed for an idea.</li> <li>- Key details begin to surface but not as developed as possible; some relevant information may be missing.</li> </ul> | <p><b>IDEAS</b></p> <ul style="list-style-type: none"> <li>- One clear main idea is developed and some closing.</li> <li>- Topic is narrow and focused.</li> <li>- The writer uses interesting, important details for support.</li> <li>- The text is a well-developed paragraph.</li> </ul>                                                   |
| <p><b>ORGANIZATION/STRUCTURE</b></p> <ul style="list-style-type: none"> <li>- Structure (Beginning/ending) is absent.</li> <li>- One simple sentence (no sense of order)</li> <li>- Connections between ideas are confusing.</li> <li>- Transitions/sequencing is not present.</li> </ul> | <p><b>ORGANIZATION</b></p> <ul style="list-style-type: none"> <li>- Structure is unclear or only starting to emerge.</li> <li>- Sequencing is confusing: The piece is little more than a list of sentences (2 or more) connected by theme (i.e., could move sentences around and not change the meaning).</li> </ul>                                                 | <p><b>ORGANIZATION</b></p> <ul style="list-style-type: none"> <li>- There is basic order with a few missteps.</li> <li>- The piece contains a beginning (a simple opening sentence.)</li> <li>- No conclusion (except “The End”).</li> <li>- Sentence parts may be linked with conjunction or connecting words (<i>but</i>,</li> </ul>                                                                 | <p><b>ORGANIZATION</b></p> <ul style="list-style-type: none"> <li>- Ideas follow a logical sequence.</li> <li>- The writing starts out strong (a beginning that sets the tone for the piece).</li> <li>- The writing includes a predictable ending.</li> <li>- Link sentences with sequencing words (e.g., first, next, then, later,</li> </ul>                                                                     | <p><b>ORGANIZATION</b></p> <ul style="list-style-type: none"> <li>- There is a clear beginning, middle, and end.</li> <li>- Everything fits together nicely; Important details support main idea.</li> <li>- Important ideas are highlighted within the text; Topic sentence for each paragraph.</li> <li>- The text slows down and</li> </ul> |

|                                                                                                                                                                                                             |                                                                                                                                                                                                                                                                                    |                                                                                                                                                                                                                                                                                                                                                                                                              |                                                                                                                                                                                                                                                                                                                                                                                                                                                                                                              |                                                                                                                                                                                                                                                                                                                                                                                                                                                                                                       |
|-------------------------------------------------------------------------------------------------------------------------------------------------------------------------------------------------------------|------------------------------------------------------------------------------------------------------------------------------------------------------------------------------------------------------------------------------------------------------------------------------------|--------------------------------------------------------------------------------------------------------------------------------------------------------------------------------------------------------------------------------------------------------------------------------------------------------------------------------------------------------------------------------------------------------------|--------------------------------------------------------------------------------------------------------------------------------------------------------------------------------------------------------------------------------------------------------------------------------------------------------------------------------------------------------------------------------------------------------------------------------------------------------------------------------------------------------------|-------------------------------------------------------------------------------------------------------------------------------------------------------------------------------------------------------------------------------------------------------------------------------------------------------------------------------------------------------------------------------------------------------------------------------------------------------------------------------------------------------|
|                                                                                                                                                                                                             |                                                                                                                                                                                                                                                                                    | <p><i>and, or, so</i>).</p> <ul style="list-style-type: none"> <li>- Simple sequencing words may be used (e.g., first, next, then).</li> </ul>                                                                                                                                                                                                                                                               | <p>finally, etc.).</p>                                                                                                                                                                                                                                                                                                                                                                                                                                                                                       | <p>speeds up to highlight the ideas and shows the writer's skill at pacing.</p> <ul style="list-style-type: none"> <li>- Clear transitions, including uncommon transition words (e.g., recently) connect one sentence to the next.</li> </ul>                                                                                                                                                                                                                                                         |
| <p><b>WORD CHOICE</b></p> <ul style="list-style-type: none"> <li>- Words can be identified, even if the spacing and spelling are not correct.</li> <li>- A few high frequency words are written.</li> </ul> | <p><b>WORD CHOICE</b></p> <ul style="list-style-type: none"> <li>- More than a few words can be identified, even if the spacing and spelling are not correct.</li> <li>- Words are fairly ordinary (i.e., functional language).</li> <li>- Mostly high frequency words.</li> </ul> | <p><b>WORD CHOICE</b></p> <ul style="list-style-type: none"> <li>- The reader begins to see what the writer is describing.</li> <li>- General or ordinary words convey message.</li> <li>- The writer tries out new words beyond the basic high frequency words and everyday language.</li> <li>- One or two words stand out.</li> <li>- Begins to show touches of originality and individuality.</li> </ul> | <p><b>WORD CHOICE</b></p> <ul style="list-style-type: none"> <li>- Tries to choose words for specificity.</li> <li>- Attempts to use descriptive words to create an image (e.g., using adjectives and adverbs).</li> <li>- Descriptive words (e.g., Raisin Bran, not cereal) are combined with generic ones.</li> <li>- There is very little repetition of words.</li> <li>- Phrases, word groups create specific mental imagery: The writing captures a general mood such as happy, sad, or mad.</li> </ul> | <p><b>WORD CHOICE</b></p> <ul style="list-style-type: none"> <li>- The writer uses everyday words and phrases with a fresh and original spin.</li> <li>- The words paint a clear picture in the reader's mind.</li> <li>- The writer uses just right words or phrases.</li> <li>- The writer might attempt figurative language.</li> <li>- The tone is identifiable – bittersweet, compassionate, frustrated, and so on.</li> <li>- Colorful words are used correctly and with creativity.</li> </ul> |
| <p><b>GRAMMAR/ FLOW</b></p> <ul style="list-style-type: none"> <li>- Tries 1 sentence, but the sentence is incomplete or needs to be edited by the reader to make sense.</li> </ul>                         | <p><b>GRAMMAR/ FLOW</b></p> <ul style="list-style-type: none"> <li>- More than 1 sentence</li> <li>- The reader stumbles when reading the text aloud and may have to back up and</li> </ul>                                                                                        | <p><b>GRAMMAR/ FLOW</b></p> <ul style="list-style-type: none"> <li>- The piece is easy to read aloud, although it may contain repetitive or awkward sentence</li> </ul>                                                                                                                                                                                                                                      | <p><b>GRAMMAR/ FLOW</b></p> <ul style="list-style-type: none"> <li>- The piece can be read aloud easily without having to stop to reread for flow.</li> </ul>                                                                                                                                                                                                                                                                                                                                                | <p><b>GRAMMAR/ FLOW</b></p> <ul style="list-style-type: none"> <li>- The piece is a breeze to read aloud.</li> <li>- Different sentence lengths give the writing a nice sound.</li> </ul>                                                                                                                                                                                                                                                                                                             |

|                                                                                                                                                         |                                                                                                                                                                                                                                                                                                                                      |                                                                                                                                                                                                                                                                                                                                                                                                                                |                                                                                                                                                                                                                                                                                                                                                                                       |                                                                                                                                                                                                                                                                                                                                                                                       |
|---------------------------------------------------------------------------------------------------------------------------------------------------------|--------------------------------------------------------------------------------------------------------------------------------------------------------------------------------------------------------------------------------------------------------------------------------------------------------------------------------------|--------------------------------------------------------------------------------------------------------------------------------------------------------------------------------------------------------------------------------------------------------------------------------------------------------------------------------------------------------------------------------------------------------------------------------|---------------------------------------------------------------------------------------------------------------------------------------------------------------------------------------------------------------------------------------------------------------------------------------------------------------------------------------------------------------------------------------|---------------------------------------------------------------------------------------------------------------------------------------------------------------------------------------------------------------------------------------------------------------------------------------------------------------------------------------------------------------------------------------|
|                                                                                                                                                         | <p>reread. (Might have to mentally edit and add words or change sentences to read.)</p> <ul style="list-style-type: none"> <li>- Uses 1 or 2 simple sentences.</li> <li>- May also include some phrases.</li> <li>- Awkward word patterns break the flow of the piece.</li> <li>- Grammar: Nonstandard grammar is common.</li> </ul> | <p>patterns.</p> <ul style="list-style-type: none"> <li>- Uses 3 or more simple sentences.</li> <li>- Sentences tend to begin the same.</li> <li>- Longer sentences go on and on.</li> <li>- Simple conjunctions (i.e., <i>and</i> and <i>but</i>) are used to make compound sentences.</li> <li>- Grammar: Attempts standard grammar: Basic subject-verb agreement occurs in simple sentences – e.g., “she walks.”</li> </ul> | <ul style="list-style-type: none"> <li>- Sentence structure varies.</li> <li>- Sentences are of different lengths.</li> <li>- Some sentences read smoothly while others will need work.</li> <li>- Connectives are correctly used in long and short sentences.</li> <li>- Grammar: Noun/pronoun agreement, verb tenses mostly consistent (past tense for the given topic).</li> </ul> | <p>There is playfulness and experimentation.</p> <ul style="list-style-type: none"> <li>- Varied sentence beginnings create a pleasing rhythm.</li> <li>- Different kinds of sentences (statements, commands, questions, and exclamations) are present.</li> <li>- The flow from one sentence to the next is smooth.</li> <li>- Grammar: Standard English grammar is used.</li> </ul> |
| <p><b>SPELLING</b></p> <p>Letters are written in strings (pre-phonetic spelling – e.g., gGmkrTt)</p>                                                    | <p><b>SPELLING</b></p> <p>The words are unreadable to the untrained eye (quasi-phonetic spelling – e.g., MRT, UM, KD, etc); Upto 5 high-frequency words spelled correctly.</p>                                                                                                                                                       | <p><b>SPELLING</b></p> <p>Spelling is inconsistent but readable (phonetic spelling – e.g., MOSTR, HMN, KLOSD, etc.); More than 10 high frequency words spelled correctly AND many incorrectly spelled.</p>                                                                                                                                                                                                                     | <p><b>SPELLING</b></p> <p>Spelling is close to transitional spelling – e.g., MONSTUR, HUMUN, CLOSED, etc.); nearly (mostly) all high-frequency words spelled correctly.</p>                                                                                                                                                                                                           | <p><b>SPELLING</b></p> <p>Spelling is correct; all high-frequency words are attempted are correct.</p>                                                                                                                                                                                                                                                                                |
| <p><b>MECHANICS</b></p> <p><b>Capitalization:</b> No intentional use of upper- and lower-case letters (mixed within words). “I” can be capitalized.</p> | <p><b>MECHANICS</b></p> <p><b>Capitalization:</b> Mostly lowercase letters.</p> <p><b>Punctuation:</b> The writer experiments with</p>                                                                                                                                                                                               | <p><b>MECHANICS</b></p> <p><b>Capitalization:</b> Capitals are used mostly correctly in the beginning of sentence or proper nouns.</p> <p><b>Punctuation:</b> End</p>                                                                                                                                                                                                                                                          | <p><b>MECHANICS</b></p> <p><b>Capitalization:</b> Capitals at the beginning of sentences AND variable use on proper nouns.</p> <p><b>Punctuation:</b> The writer</p>                                                                                                                                                                                                                  | <p><b>MECHANICS</b></p> <p><b>Capitalization:</b> The writer applies basic capitalization rules with consistency.</p> <p><b>Punctuation:</b> Punctuation marks are used effectively to</p>                                                                                                                                                                                            |

|                                                                                                                                                                                                                                          |                                                                                                                                                                                                                                                                                                                                                                                               |                                                                                                                                                                                                                                                                                           |                                                                                                                                                                                                                 |                                                                                                                                                                                                       |
|------------------------------------------------------------------------------------------------------------------------------------------------------------------------------------------------------------------------------------------|-----------------------------------------------------------------------------------------------------------------------------------------------------------------------------------------------------------------------------------------------------------------------------------------------------------------------------------------------------------------------------------------------|-------------------------------------------------------------------------------------------------------------------------------------------------------------------------------------------------------------------------------------------------------------------------------------------|-----------------------------------------------------------------------------------------------------------------------------------------------------------------------------------------------------------------|-------------------------------------------------------------------------------------------------------------------------------------------------------------------------------------------------------|
| <p><b>Punctuation:</b> Punctuation is not present.</p>                                                                                                                                                                                   | <p>punctuation.</p>                                                                                                                                                                                                                                                                                                                                                                           | <p>punctuation marks (!?) are generally used correctly.</p>                                                                                                                                                                                                                               | <p>uses punctuation correctly and may try more advanced punctuations (commas, dashes, quotation marks) but not always correctly.</p>                                                                            | <p>guide the reader.</p>                                                                                                                                                                              |
| <p><b>HANDWRITING</b></p> <ul style="list-style-type: none"> <li>- There is no consistent shape to the letters.</li> <li>- The overall appearance of handwriting is messy and illegible.</li> <li>- No spacing between words.</li> </ul> | <p><b>HANDWRITING</b></p> <ul style="list-style-type: none"> <li>- Letters are in different directions and form different shapes and sizes.</li> <li>- A few letters might be unreadable because of their shape or if they overlap.</li> <li>- Inconsistent spaces between words.</li> <li>- Letter shapes are inconsistent for 2 or more letters and letters are not on the line.</li> </ul> | <p><b>HANDWRITING</b></p> <ul style="list-style-type: none"> <li>- There are some discrepancies in letter shapes and size, but they are easily identifiable.</li> <li>- Consistently spaces between words.</li> </ul> <p>Letters are consistently represented throughout the writing.</p> | <p><b>HANDWRITING</b></p> <ul style="list-style-type: none"> <li>- Most letters are formed correctly and legibly.</li> <li>- Handwriting begins to show style with consistent letter shape and size.</li> </ul> | <p><b>HANDWRITING</b></p> <ul style="list-style-type: none"> <li>- Letters are consistently well-formed in size and shape and are easy to read.</li> <li>- Letters are mostly on the line.</li> </ul> |

Scored Writing Samples

Ideas = 2; Organization = 3; Word Choice = 3; Sentence Fluency = 3; Spelling = 5;  
Handwriting = 3; Mechanics = 2

One day, when I got home from school...

One day when I got  
home from school  
I rode the bus the  
I went straight home  
The next day I learned  
something at school  
School was kind of  
like a hard school  
I like going to school.

the school was a  
nice school there  
I had some very  
nice friend at my  
school then we were  
at lunch time My  
school is the biggest  
school in the world  
school is fun,

Ideas = 4; Organization = 3; Word Choice = 4; Sentence Fluency = 3; Spelling = 3;  
Handwriting = 3; Mechanics = 1

Note: Words written under student's writing are what assessors wrote based on the child said he had written.

One day, when I got home from school...

I went swimming

at wakulla springs it

was fun I

had friends

to play with

I had

fun at the

beach it was

fun today

I had pepo  
people

to play wid  
with

my friends

at the beach

I had a

skin board  
skin board

and a knee  
knee

diver it was  
diving board

fun wid it  
with



I made a

made

sand castle

sand castle

then I went

went

to the park

Ideas = 5; Organization = 4; Word Choice = 3; Sentence Fluency = 4; Spelling = 4;  
Handwriting = 3; Mechanics = 4

One day, when I got home from school...

One day when I got home from school...

a unicorn was in my room.

It was so big that I had to get

a stool to get on her. I

asked my mom if I could

keep her. she said yes! so

I practised flying on her

giddy up!! I screamed. she was

so lucky to be my pet. she
